# Supplementary material for: Considering Grouped or Individual Non-Methane Volatile Organic Compound Emissions in Life Cycle Assessment of Composting Using Three Life Cycle Impact Assessment Methods
Source: MDPI journal article supplement (doi:10.3390/recycling9030035), 2024-04-29
Supplement: s1 [file s1]

Supplementary material for

“Considering Grouped or Individual NMVOC Emissions in Life Cycle assessment of composting  
using three LCIA methods

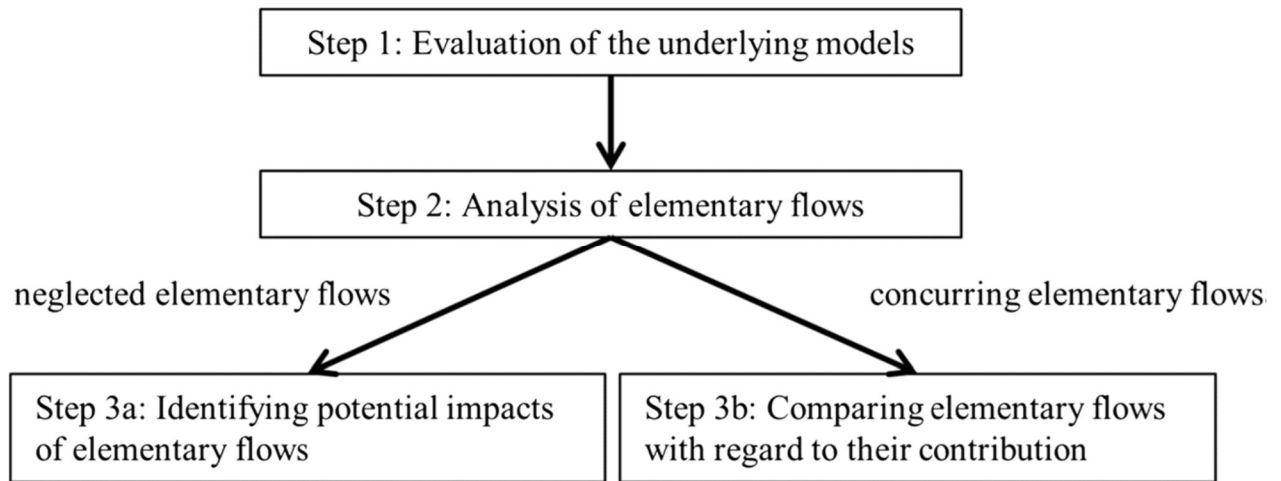

Figure S1: Overview of the three-step approach to evaluate LCIA methods developed by Bach und Finkbeiner (2017)

Table S1: Characterisation factor used for by the LCIA methods for individual NMVOCs for the impact categories ozone formation and freshwater ecotoxicity

|                    | Ozone formation |          |              |         | Freshwater ecotoxicity |          |            |         |            |
|--------------------|-----------------|----------|--------------|---------|------------------------|----------|------------|---------|------------|
|                    | ReCiPe          |          | EF 3.0       | IMPACT+ | ReCiPe                 | EF 3.0   |            | IMPACT+ |            |
|                    | kg NOx eq.      |          | kg NMVOC eq. |         | kg 1,4 DCB             | kg CTUe  | kg 1,4 DCB | kg CTUe | kg 1,4 DCB |
| Styrene            | 1.8E-02         | -2.0E-02 | 2.4E-01      | 2.4E-01 | 5.4E-06                | 1.6E-02  | 3.46E-03   | 1.6E-02 | 4.2E-03    |
| 2-Pentanone        | -3.6E-03        | 1.4E+00  | 9.3E-01      | n.a     | 5.6E-05                | 5.8E-02  | 1.30E-02   | 5.0E-02 | 1.3E-02    |
| Alpha-pinene       | 2.5E-01         | 6.7E-01  | n.a          | n.a     | 2.6E-08                | 2.9E-04  | 6.38E-05   | 7.3E-04 | 2.0E-04    |
| Beta-pinene        | 1.2E-01         | 1.4E+00  | n.a          | n.a     | 2.5E-06                | 1.9E-02  | 4.31E-03   | 2.9E-02 | 7.6E-03    |
| Limonene           | n.a             | n.a      | n.a          | n.a     | 6.3E-02                | 2.3E-03  | 2.16E-04   | 4.1E-03 | 5.4E-04    |
| Dimethyl disulfide | n.a             | n.a      | n.a          | n.a     | n.a                    | 7.3E-01* | 0.00E+00   | n.a     | 0.0E+00    |
| Pyridine           | n.a             | n.a      | n.a          | n.a     | 3.8E-03                | 4.0E+00  | 8.86E-01   | 2.6E+00 | 6.8E-01    |
| Toluene            | 1.6E-01         | 1.7E+00  | 1.1E+00      | 1.1E+00 | 1.5E-05                | 1.3E-02  | 2.86E-03   | 1.1E-02 | 3.0E-03    |
| Xylene             | 3.1E-01         | 7.3E-01  | n.a          | n.a     | 8.2E-06                | 1.1E-02  | 4.13E-03   | 1.0E-02 | 4.8E-03    |
| Decane             | 1.3E-01         | 8.9E-01  | 6.5E-01      | 6.5E-01 | 5.6E-07                | 2.0E-03  | 4.38E-04   | 4.7E-03 | 1.2E-03    |
| Grouped NMVOC      | 1.8E-01         | 1        | 1            | 1       | n.a                    | 8.609    | n.a        | n.a     | n.a        |

Table S2: Characterisation factor used for by the LCIA methods for individual NMVOCs for the impact categories ozone formation and freshwater ecotoxicity

|                    | Human toxicity, Carcinogenic |         |         | Human toxicity, Non-carcinogenic |          |         |
|--------------------|------------------------------|---------|---------|----------------------------------|----------|---------|
|                    | ReCiPe                       | EF 3.0  | IMPACT+ | ReCiPe                           | EF 3.0   | IMPACT+ |
|                    | kg 1,4-DCB                   | CTUh    | CTUh    | kg 1,4-DCB                       | CTUh     | CTUh    |
| Styrene            | 1.3E+00                      | 5.1E-07 | 5.1E-07 | 8.6E-01                          | 1.0E-07  | 1.0E-07 |
| 2-Pentanone        | n.a                          | n.a     | n.a     | n.a                              | n.a      | n.a     |
| Alpha-pinene       | n.a                          | n.a     | n.a     | n.a                              | n.a      | n.a     |
| Beta-pinene        | n.a                          | n.a     | n.a     | n.a                              | n.a      | n.a     |
| Limonene           | 6.3E-02                      | 4.3E-08 | 4.3E-08 | n.a                              | n.a      | n.a     |
| Dimethyl disulfide | n.a                          | n.a     | n.a     | n.a                              | n.a      | n.a     |
| Pyridine           | 7.5E+00                      | 1.8E-06 | 1.6E-06 | 7.7E+01                          | 5.6E-06  | 4.7E-06 |
| Toluene            | 1.3E-02                      | 3.2E-12 | 4.6E-12 | 8.6E-01                          | 5.3E-08  | 5.1E-08 |
| Xylene             | 2.0E-02                      | 4.8E-09 | 4.7E-09 | 1.6E+00                          | 1.1E-07  | 1.1E-07 |
| Decane             | n.a                          | n.a     | n.a     | n.a                              | n.a      | n.a     |
| Grouped NMVOC      | n.a                          | n.a     | n.a     | n.a                              | 6.22E-08 | n.a     |

Table S3: List of LCA studies investigating VOC emissions from composting processes.

|                               | VOCs    | Material composted | Impacts covered                        | MP-EP | Location | Measured? | Bio-filter | Type of composting                                     | Scale                 | Composting stages           | Compost LCA study | Composting time                       | LCIA method |
|-------------------------------|---------|--------------------|----------------------------------------|-------|----------|-----------|------------|--------------------------------------------------------|-----------------------|-----------------------------|-------------------|---------------------------------------|-------------|
| (Cadena et al. 2009)          | Grouped | MSW                | CO <sub>2</sub> , VOC, NH <sub>3</sub> | -     | Spain    | Yes       | Yes        | Intensive - Closed aeration, biofilter<br>Open windrow |                       | Intensive, Maturation       | Partially         | 2 weeks Intensive<br>6-8 weeks Mature |             |
| (Cadena et al. 2009)          | Grouped | MSW                | CC, AP, POF, EP, HAT, ODP              | MP    | Spain    | Yes       | Yes        |                                                        | 6,000 t OFMSW /year   | Intensive, Maturation       |                   | 4 weeks Intensive<br>6-8 weeks Mature | CML         |
| (Quirós et al. 2014)          | Grouped | MSW                | CC, AP, POF, EP, ODP, CED              | MP    | Spain    | No        | No         |                                                        | Pilot-home composting |                             | Yes               |                                       | CML         |
| (Colón et al. 2012)           | Grouped | MSW                | CC, AP, POF, ODP, CED, HT, ADP         | MP    | Spain    | Yes       | Yes        | In-vessel composting                                   | 7435t /year           | Decomposition phase, Curing | Yes               |                                       | CML         |
| (Al-Rumaihi et al. 2020)      | Grouped | MSW                |                                        |       | Qatar    | No        |            |                                                        |                       |                             |                   |                                       |             |
| (Martínez-Blanco et al. 2010) | Grouped | MSW                | CC, AP, POF, ODP, CED, EP, ADP         | MP    | Spain    | Yes       | Yes        |                                                        | Industrial            | Decomposition phase, Curing |                   |                                       |             |
| (Colón et al. 2009)           | Grouped | MSW                | CC, AP, POF, ODP, CED, EP, ADP         | MP    | Spain    | Yes       |            |                                                        | Home                  |                             |                   |                                       |             |

Table S4: List of LCA studies investigating individual NMVOC emissions arising from composting. The individual VOC numbers are elaborated in Table S5.

|                                           | VOCs                                         | Material composted                      | Impacts covered                                  | Location | Measured emissions | Biofilter | Filtration efficiency | Type of composting | Scale                         | Composting stages              | Composting time                         | Compost Emission study | Compost LCA study |
|-------------------------------------------|----------------------------------------------|-----------------------------------------|--------------------------------------------------|----------|--------------------|-----------|-----------------------|--------------------|-------------------------------|--------------------------------|-----------------------------------------|------------------------|-------------------|
| (Sánchez-Monedero et al. 2018)            | 1-31                                         | MSW                                     | None                                             | Spain    | Yes                | No        |                       | Open composting    | 40000 t/year<br>30m*2m height | Intensive+ Maturation          | Week 1,2,3 and 8                        | Yes                    |                   |
| (Nie et al. 2018)                         | 1,2,5,6,10,24,26, 30, 32-67                  | MSW                                     | Human health risk-Non-carcinogenic, Carcinogenic | China    | Yes                | No        |                       | n.d                | 2000 t/d                      | Tipping, Intensive, Maturation | Intensive 2 Weeks<br>Maturation 3 Weeks | Yes                    |                   |
| (Maulini-Duran et al. 2014)               | 5, 7, 17, 24, 26, 27, 30, 37, 44, 68         | MSW                                     | None                                             | Spain    | Yes                | No        |                       | n.d                | pilot scale- 100 kg           | Intensive composting           | Total 25 days                           | Yes                    |                   |
| Kumar et al., 2011<br>(Colón et al. 2009) |                                              |                                         | ADP, AP, EP, GWP, ODP, POP, CED                  |          |                    |           |                       |                    | home composting               |                                |                                         |                        | Yes               |
| (Pagans et al. 2006)                      | Grouped VOCs                                 | MSW                                     |                                                  | Spain    | Yes                | Yes       | 0-60%                 |                    | Lab scale, 30l                |                                | 6 days                                  | Yes                    |                   |
| (Komilis et al. 2004)                     | 5, 7, 43, 44, 46, 47, 67, 69, 70, 71, 72, 73 | mixed waste including paper, food waste | None                                             | Greece   | Yes                | No        |                       |                    | Lab-scale 25l                 |                                | 47 days                                 | Yes                    |                   |

|                                 |                                                          |     |              |          |     |     |                                    |                              |               |     |
|---------------------------------|----------------------------------------------------------|-----|--------------|----------|-----|-----|------------------------------------|------------------------------|---------------|-----|
| (Saldarria et al. 2014)         | Grouped VOCs                                             | MSW | Human health | Colombia | Yes | No  | 1300 kg/batch                      |                              |               |     |
| (Lehtinen et al. 2013)          | 1, 8, 10, 24, 26, 37, 40, 43, 45, 86-96                  | MSW | Human health | Finland  | Yes | No  | Composting plant                   | Sorting and Separation stage | Yes           |     |
| (Delgado-Rodríguez et al. 2012) | 1, 5, 16, 24, 27, 30, 52, 75                             | MSW |              | Spain    | Yes | No  | Composting plant                   | Intensive composting         | 5 weeks       | Yes |
| (Pierucci et al. 2005)          | 5, 24, 26, 45, 97, 98, 99                                | MSW |              | Italy    | Yes | Yes | pilot plant                        | Intensive composting         | 1 week        | Yes |
| (Tsai et al. 2008)              | 5, 7, 8, 24, 26, 27, 39, 40, 43, 44, 45, 52, 89, 100-103 | MSW |              | Taiwan   | Yes | No  | Composting plant                   |                              |               | Yes |
| (Mao et al. 2006)               | 5, 7, 40, 42 -45, 100-104                                | MSW |              | Taiwan   | Yes | Yes | Composting plant- 20 -30 tonne/day |                              | 20 to 30 days | Yes |

Table S5: List of NMVOC emissions arising from composting of MSW

|   | (Sánchez-Monedero et al. 2018) | (Nie et al. 2018) | (Maulini-Duran et al. 2014) | (Komilis et al. 2004) | (Lehtinen et al. 2013) | (Delgado-Rodríguez et al. 2012) | (Pierucci et al. 2005) | (Tsai et al. 2008) | (Mao et al. 2006) | Number of studies investigating the NMVOC |
|---|--------------------------------|-------------------|-----------------------------|-----------------------|------------------------|---------------------------------|------------------------|--------------------|-------------------|-------------------------------------------|
| 1 | Undecane                       | Undecane          |                             |                       | Undecane               | Undecane                        |                        |                    |                   | 4                                         |
| 2 | Dodecane                       | Dodecane          |                             |                       |                        |                                 |                        |                    |                   | 2                                         |
| 3 | Tridecane                      |                   |                             |                       |                        |                                 |                        |                    |                   | 1                                         |
| 4 | Tetradecane                    |                   |                             |                       |                        |                                 |                        |                    |                   | 1                                         |
| 5 | Toluene                        | Toluene           | Toluene                     | Toluene               |                        | Toluene                         | Toluene                | Toluene            | Toluene           | 8                                         |

|    |                         |                         |              |         |              |             |              |              |   |
|----|-------------------------|-------------------------|--------------|---------|--------------|-------------|--------------|--------------|---|
| 6  | 1,2,3-Trimethyl benzene | 1,2,3-trimethyl-Benzene |              |         |              |             |              |              | 2 |
| 7  | Styrene                 |                         | Styrene      | Styrene |              |             | Styrene      | Styrene      | 5 |
| 8  | p-Cymene                |                         |              |         | p-Cymene     |             | p-Cymene     |              | 3 |
| 9  | o-Isopropeniltoluene    |                         |              |         |              |             |              |              | 1 |
| 10 | Ethanol                 | Ethanol                 |              |         | Ethanol      |             |              |              | 3 |
| 11 | 1-Butanol               |                         |              |         |              |             |              |              | 1 |
| 12 | 1-Pentanol              |                         |              |         |              |             |              |              | 1 |
| 13 | 1-Hexanol               |                         |              |         |              |             |              |              | 1 |
| 14 | 2-Ethyl-1-hexanol       |                         |              |         |              |             |              |              | 1 |
| 15 | 4-Methyl phenol         |                         |              |         |              |             |              |              | 1 |
| 16 | Phenol                  |                         |              |         | Phenol       |             |              |              | 2 |
| 17 | 2-Pentanone             |                         | 2-Pentanone  |         |              |             |              |              | 2 |
| 18 | 2-Heptanone             |                         |              |         |              |             |              |              | 1 |
| 19 | Ethanoic acid/Acetic    |                         |              |         |              |             |              |              | 1 |
| 20 | Propanoic acid          |                         |              |         |              |             |              |              | 1 |
| 21 | 2-Methyl propanic acid  |                         |              |         |              |             |              |              | 1 |
| 22 | Butanoic acid           |                         |              |         |              |             |              |              | 1 |
| 23 | Hexanoic acid           |                         |              |         |              |             |              |              | 1 |
| 24 | D-Limonene              | Limonene                | Limonene     |         | Limonene     | Limonene    | Limonene     | Limonene     | 7 |
| 25 | Beta-Myrcene            |                         |              |         |              |             |              |              | 1 |
| 26 | Alpha-Pinene            | Alpha-Pinene            | Alpha-Pinene |         | Alpha-Pinene |             | Alpha-Pinene | Alpha-Pinene | 6 |
| 27 | Beta-Pinene             |                         | Beta-Pinene  |         |              | Beta-Pinene |              | Beta-Pinene  | 4 |
| 28 | Pyrazine                |                         |              |         |              |             |              |              | 1 |

|    |                        |                                 |                       |                                 |                  |                       |                  |                  |   |
|----|------------------------|---------------------------------|-----------------------|---------------------------------|------------------|-----------------------|------------------|------------------|---|
| 29 | Trimethyl-<br>pyrazine |                                 |                       |                                 |                  |                       |                  |                  | 1 |
| 30 | Dimethyl<br>disulfide  | Dimethyl<br>disulfide           | Dimethyl<br>disulfide |                                 |                  | Dimethyl<br>disulfide |                  |                  | 4 |
| 31 | 2-Pentyl furan         |                                 |                       |                                 |                  |                       |                  |                  | 1 |
| 32 |                        | Butane                          |                       |                                 |                  |                       |                  |                  | 1 |
| 33 |                        | Pentane                         |                       |                                 |                  |                       |                  |                  | 1 |
| 34 |                        | Cyclopentan<br>e                |                       |                                 |                  |                       |                  |                  | 1 |
| 35 |                        | Heptane                         |                       |                                 |                  |                       |                  |                  | 1 |
| 36 |                        | Octane                          |                       |                                 |                  |                       |                  |                  | 1 |
| 37 |                        | Decane                          | Decane                |                                 | Decane           |                       |                  |                  | 3 |
| 38 |                        | Propylene                       |                       |                                 |                  |                       |                  |                  | 1 |
| 39 |                        | Acetone                         |                       |                                 |                  |                       | Acetone          | Acetone          | 3 |
| 40 |                        | Ethyl acetate                   |                       |                                 | Ethyl acetate    |                       | Ethyl<br>acetate | Ethyl<br>acetate | 4 |
| 41 |                        | 2-Hexanone                      |                       |                                 |                  |                       |                  |                  | 1 |
| 42 |                        | Benzene                         |                       |                                 |                  |                       |                  | Benzene          | 2 |
| 43 |                        | Ethylbenzen<br>e                |                       | Ethylbenzen<br>e                | Ethylbenzen<br>e |                       | Ethylbenze<br>ne | Ethylbenz<br>ene | 5 |
| 44 |                        | m+p-Xylenes                     | Xylene                | p/m-Xylene                      |                  |                       | m,o-<br>xylene   | o- xylene        | 5 |
| 45 |                        | o-Xylene                        |                       |                                 | p-xylene         | p-xylene              | p-xylene         | p-xylene         | 5 |
| 46 |                        | 1,3,5-<br>trimethyl-<br>Benzene |                       | 1,3,5-<br>trimethyl-<br>Benzene |                  |                       |                  |                  | 2 |
| 47 |                        | 1,2,4-<br>trimethyl-<br>Benzene |                       | 1,2,4-<br>trimethyl-<br>Benzene |                  |                       |                  |                  | 2 |
| 48 |                        | m-<br>Diethylbenze<br>ne        |                       |                                 |                  |                       |                  |                  | 2 |



|    |                        |                 |                 |  |   |
|----|------------------------|-----------------|-----------------|--|---|
| 49 | p-Diethylbenzene       |                 |                 |  | 1 |
| 50 | Styrene                |                 |                 |  | 1 |
| 51 | Methanethiol           |                 |                 |  | 1 |
| 52 | Dimethylsulfide        | Dimethylsulfide | Dimethylsulfide |  | 3 |
| 53 | Carbon disulfide       |                 |                 |  | 2 |
| 54 | Chloromethane          |                 |                 |  | 1 |
| 55 | Methylene chloride     |                 |                 |  | 1 |
| 56 | Chloroform             |                 |                 |  | 1 |
| 57 | Carbon tetrachloride   |                 |                 |  | 1 |
| 58 | Ethyl chloride         |                 |                 |  | 1 |
| 59 | 1,1-Dichloroethane     |                 |                 |  | 1 |
| 60 | 1,2-Dichloroethane     |                 |                 |  | 1 |
| 61 | 1,1,2-Trichloroethane  |                 |                 |  | 1 |
| 62 | 1,1-Dichloroethane     |                 |                 |  | 1 |
| 63 | (E)-1,2-Dichloroethene |                 |                 |  | 1 |
| 64 | (Z)-1,2-Dichloroethene |                 |                 |  | 1 |

|    |                      |                      |            |   |
|----|----------------------|----------------------|------------|---|
| 65 | 1,3-Dichloro-Benzene |                      |            | 2 |
| 66 | Chlorobenzene        |                      |            | 2 |
| 67 | 1,4-Dichloro-Benzene | 1,4-Dichloro-Benzene |            | 2 |
| 68 |                      | Pyridine             |            | 1 |
| 69 |                      | Isopropylbenzene     |            | 1 |
| 70 |                      | n-Propylbenzene      |            | 1 |
| 71 |                      | p-Isopropyltoluene   |            | 1 |
| 72 |                      | n-Butylbenzene       |            | 1 |
| 73 |                      | Naphthalene          |            | 1 |
| 74 |                      |                      |            | 1 |
| 75 |                      |                      | 2-butanone | 1 |
| 76 |                      |                      |            | 1 |
| 77 |                      |                      |            | 1 |
| 78 |                      |                      |            | 1 |
| 79 |                      |                      |            | 1 |
| 80 |                      |                      |            | 1 |
| 81 |                      |                      |            | 1 |

|    |                          |                         |   |
|----|--------------------------|-------------------------|---|
| 82 |                          |                         | 1 |
| 83 |                          |                         | 1 |
| 84 |                          |                         | 1 |
| 85 |                          |                         | 1 |
| 86 | 2- Propanol              |                         | 1 |
| 87 | 2,3-<br>Butanedione      |                         | 1 |
| 88 | 3-Hydroxy-2-<br>butanone |                         | 1 |
| 89 | Acetic acid              | Acetic acid             | 2 |
| 90 | Propyl<br>benzene        |                         | 1 |
| 91 | Nonane                   |                         | 1 |
| 92 | 4-Methyl<br>nonane       |                         | 1 |
| 93 | 2-Methyl<br>nonane       |                         | 1 |
| 94 | 3-methyl<br>nonane       |                         | 1 |
| 95 | Trichloro<br>ethene      |                         | 1 |
| 96 | Tetrachloro<br>ethene    |                         | 1 |
| 97 |                          | Trichloroeth<br>ylene   | 1 |
| 98 |                          | Tetrachloroe<br>thylene | 1 |

|     |  |                  |               |   |
|-----|--|------------------|---------------|---|
| 99  |  | Trimethylbenzene |               | 1 |
| 100 |  | Pentene          | Pentene       | 2 |
| 101 |  | Hexene           | Hexene        | 2 |
| 102 |  | Methylacetate    | Methylacetate | 2 |
| 103 |  | Butanone         | Butanone      | 2 |

---

Table S6: Amount of NMVOC compounds before and after biofiltration (kg/t compost produced)

|                    | Pre-biofiltration | Elimination rate in Biofilter <sup>1</sup> | Post-biofiltration |
|--------------------|-------------------|--------------------------------------------|--------------------|
| Styrene            | 8.3E-04           | 90%                                        | 8.3E-05            |
| 2-Pentanone        | 2.8E-03           | 90%                                        | 2.8E-04            |
| Alpha-pinene       | 2.8E-03           | 93%                                        | 2.0E-04            |
| Beta-pinene        | 9.5E-04           | 97%                                        | 2.9E-05            |
| Limonene           | 6.9E-02           | 25%                                        | 5.2E-02            |
| Dimethyl disulfide | 1.4E-01           | 74%                                        | 3.7E-02            |
| Pyridine           | 8.2E-04           | 80%                                        | 1.6E-04            |
| Toluene            | 5.1E-03           | 83%                                        | 8.6E-04            |
| Xylene             | 1.4E-03           | 96%                                        | 5.5E-05            |
| Decane             | 5.3E-03           | 93%                                        | 3.7E-04            |
| Total VOC          | 2.3E-01           |                                            | 9.0E-02            |

1- The elimination rate was estimated from (Pagans et al. 2005) and (Liu et al. 2009)

## References (S)

Al-Rumaihi, Aisha; McKay, Gordon; Mackey, Hamish R.; Al-Ansari, Tareq (2020): Environmental Impact Assessment of Food Waste Management Using Two Composting Techniques. In: *Sustainability* 12 (4), S. 1595. DOI: 10.3390/su12041595.

Bach, Vanessa; Finkbeiner, Matthias (2017): Approach to qualify decision support maturity of new versus established impact assessment methods—demonstrated for the categories acidification and eutrophication. In: *Int J LCA* 22 (3), S. 387–397. DOI: 10.1007/s11367-016-1164-z.

Cadena, Erasmo; Colón, Joan; Sánchez, Antoni; Font, Xavier; Artola, Adriana (2009): A methodology to determine gaseous emissions in a composting plant. In: *Waste management (New York, N.Y.)* 29 (11), S. 2799–2807. DOI: 10.1016/j.wasman.2009.07.005.

Colón, Joan; Cadena, Erasmo; Pognani, Michele; Barrena, Raquel; Sánchez, Antoni; Font, Xavier; Artola, Adriana (2012): Determination of the energy and environmental burdens associated with the biological treatment of source-separated Municipal Solid Wastes. In: *Energy Environ. Sci.* 5 (2), S. 5731–5741. DOI: 10.1039/C2EE01085B.

- Colón, Joan; Martínez-Blanco, Julia; Gabarrell, Xavier; Rieradevall, Joan; Font, Xavier; Artola, Adriana; Sánchez, Antoni (2009): Performance of an industrial biofilter from a composting plant in the removal of ammonia and VOCs after material replacement. In: *J. Chem. Technol. Biotechnol.* 84 (8), S. 1111–1117. DOI: 10.1002/jctb.2139.
- Delgado-Rodríguez, M.; Ruiz-Montoya, M.; Giraldez, I.; López, R.; Madejón, E.; Díaz, M. J. (2012): Effect of aeration rate and moisture content on the emissions of selected VOCs during municipal solid waste composting. In: *J Mater Cycles Waste Manag* 14 (4), S. 371–378. DOI: 10.1007/s10163-012-0080-y.
- Komilis, Dimitris P.; Ham, Robert K.; Park, Jae K. (2004): Emission of volatile organic compounds during composting of municipal solid wastes. In: *Water research* 38 (7), S. 1707–1714. DOI: 10.1016/j.watres.2003.12.039.
- Lehtinen, Jenni; Tolvanen, Outi; Nivukoski, Ulla; Veijanen, Anja; Hänninen, Kari (2013): Occupational hygiene in terms of volatile organic compounds (VOCs) and bioaerosols at two solid waste management plants in Finland. In: *Waste management (New York, N.Y.)* 33 (4), S. 964–973. DOI: 10.1016/j.wasman.2012.11.010.
- Liu, Qiang; Li, Mi; Chen, Rong; Li, Zhengyue; Qian, Guangren; An, Taicheng et al. (2009): Biofiltration treatment of odors from municipal solid waste treatment plants. In: *Waste management (New York, N.Y.)* 29 (7), S. 2051–2058. DOI: 10.1016/j.wasman.2009.02.002.
- Mao, I-Fang; Tsai, Chung-Jung; Shen, Shu-Hung; Lin, Tsair-Fuh; Chen, Wang-Kun; Chen, Mei-Lien (2006): Critical components of odors in evaluating the performance of food waste composting plants. In: *The Science of the total environment* 370 (2-3), S. 323–329. DOI: 10.1016/j.scitotenv.2006.06.016.
- Martínez-Blanco, Julia; Colón, Joan; Gabarrell, Xavier; Font, Xavier; Sánchez, Antoni; Artola, Adriana; Rieradevall, Joan (2010): The use of life cycle assessment for the comparison of biowaste composting at home and full scale. In: *Waste management (New York, N.Y.)* 30 (6), S. 983–994. DOI: 10.1016/j.wasman.2010.02.023.
- Maulini-Duran, Caterina; Puyuelo, Belen; Artola, Adriana; Font, Xavier; Sánchez, Antoni; Gea, Teresa (2014): VOC emissions from the composting of the organic fraction of municipal solid waste using standard and advanced aeration strategies. In: *J. Chem. Technol. Biotechnol.* 89 (4), S. 579–586. DOI: 10.1002/jctb.4160.
- Nie, Erqi; Zheng, Guodi; Shao, Zhuze; Yang, Jun; Chen, Tongbin (2018): Emission characteristics and health risk assessment of volatile organic compounds produced during municipal solid waste composting. In: *Waste management (New York, N.Y.)* 79, S. 188–195. DOI: 10.1016/j.wasman.2018.07.024.
- Pagans, Estel.la; Font, Xavier; Sánchez, Antoni (2005): Biofiltration for ammonia removal from composting exhaust gases. In: *Chemical Engineering Journal* 113 (2-3), S. 105–110. DOI: 10.1016/j.cej.2005.03.004.
- Pagans, Estela; Font, Xavier; Sánchez, Antoni (2006): Emission of volatile organic compounds from composting of different solid wastes: abatement by biofiltration. In: *Journal of hazardous materials* 131 (1-3), S. 179–186. DOI: 10.1016/j.jhazmat.2005.09.017.

Pierucci, Paola; Porazzi, Elena; Martinez, Mercedes Pardo; Adani, Fabrizio; Carati, Cesare; Rubino, Federico Maria et al. (2005): Volatile organic compounds produced during the aerobic biological processing of municipal solid waste in a pilot plant. In: *Chemosphere* 59 (3), S. 423–430. DOI: 10.1016/j.chemosphere.2004.10.040.

Quirós, Roberto; Villalba, Gara; Muñoz, Pere; Colón, Joan; Font, Xavier; Gabarrell, Xavier (2014): Environmental assessment of two home composts with high and low gaseous emissions of the composting process. In: *Resources, Conservation and Recycling* 90, S. 9–20. DOI: 10.1016/j.resconrec.2014.05.008.

Saldarriaga, Juan F.; Aguado, Roberto; Morales, Gladis E. (2014): Assessment of VOC Emissions from Municipal Solid Waste Composting. In: *Environmental Engineering Science* 31 (6), S. 300–307. DOI: 10.1089/ees.2013.0475.

Sánchez-Monedero, M. A.; Fernández-Hernández, A.; Higashikawa, F. S.; Cayuela, M. L. (2018): Relationships between emitted volatile organic compounds and their concentration in the pile during municipal solid waste composting. In: *Waste management (New York, N.Y.)* 79, S. 179–187. DOI: 10.1016/j.wasman.2018.07.041.

Tsai, Chung-Jung; Chen, Mei-Lien; Ye, An-Di; Chou, Ming-Shean; Shen, Shu-Hung; Mao, I.-Fang (2008): The relationship of odor concentration and the critical components emitted from food waste composting plants. In: *Atmospheric Environment* 42 (35), S. 8246–8251. DOI: 10.1016/j.atmosenv.2008.07.055.
